1 **Isolation, identification and functional characterization of cultivable bacteria**  
2 **from Arabian Sea and Bay of Bengal water samples reveals high diversity**

3 Shriram N. Rajpathak<sup>1</sup>, Yugandhara M. Patil<sup>1</sup>, Roumik Banerjee<sup>1</sup>, Asmita M. Khedkar<sup>1</sup>, Pawan  
4 G. Mishra<sup>1</sup>, Mandar Paingankar<sup>1</sup>, Deepti D. Deobagkar<sup>1, 2,\*</sup>

5 <sup>1</sup> Molecular Biology Research Laboratory, Centre for Advanced Studies, Department of Zoology,  
6 Savitribai Phule Pune University, Pune - 411 007, India.

7 <sup>2</sup> ISRO Chair Professor, ISRO Cell, Savitribai Phule Pune University, Pune - 411 007, India.

8 \*Correspondence

9 Dr. Deepti D. Deobagkar,

10 ISRO Chair Professor,

11 Department of Zoology, Centre for Advance Studies,

12 Savitribai Phule Pune University, Pune 411007, India.

13 Tel.: +919921184871.

14 E-mail- [deepti.deobagkar@gmail.com](mailto:deepti.deobagkar@gmail.com)

15

16

17

18

19

20

21

22

## 23 **Abstract**

24 The oxygen minimum zone of the Arabian Sea (AS) and Bay of Bengal (BOB) is rich in organic matter and is an  
25 unusual niche. Bacteria present in the oceanic water play an important role in ecology since they are responsible for  
26 decomposing, mineralizing of organic matter and in elemental cycling like nitrogen, sulfur, phosphate. This study  
27 focuses on culturing bacteria from oxygen minimum zones (OMZ) and non-OMZ regions and their phylogenetic as  
28 well as the functional characterization. Genotypic characterization of the isolates using amplified rDNA based  
29 16SrRNA sequencing grouped them into various phylogenetic groups such as alpha-proteobacteria, gamma-  
30 proteobacteria and unaffiliated bacteria. The cultivable bacterial assemblages encountered belonged to the genus  
31 *Halomonas*, *Marinobacter*, *Idiomarina*, *Pshyctobacter* and *Pseudoalteromonas*. Among the enzymatic activities,  
32 carbohydrate utilization activity was most predominant (100%) and microorganisms possessed amylase, cellulase,  
33 xylanase and chitinase. A large proportion of these bacteria (60%) were observed to be hydrocarbon consuming and  
34 many were resistant to ampicillin, chloramphenicol, kanamycin and streptomycin. The high diversity and high  
35 percentage of extracellular hydrolytic enzyme activities along with hydrocarbon degradation activity of the culturable  
36 bacteria reflects their important ecological role in oceanic biogeochemical cycling. Further assessment confirmed the  
37 presence of nitrogen reduction capability in these cultivable bacteria which highlights their importance in oceanic  
38 geochemical cycling.

## 39 **Keywords:**

40 Oxygen minimum zone; 16S rRNA sequencing, enzyme activity; Arabia Sea; Bay of Bengal.

41

42

43

44

45

46

47

48

## 49 **1. Introduction**

50 Marine microorganisms are exposed to diverse environmental parameters including temperature, pressure, salinity  
51 and oxygen concentration [1]. Bioactive compounds discovered from marine microbes are important for  
52 biotechnological applications and have medicinal importance [2–5]. More than 15,000 chemical substances including  
53 4196 bioactive marine natural products have been isolated from marine organisms [6] highlighting the potential and  
54 importance of cultivable marine microorganisms.

55 Oxygen plays an important role in shaping the aquatic ecosystem which controls the spatio-temporal distribution of  
56 all living organisms from microbes to higher organisms. Low oxygen (<20  $\mu\text{M}$ ) [7] regions can be observed in various  
57 aquatic ecosystems including stagnant freshwater, saline lakes [8], and marine basins with restricted circulation [8].  
58 In marine regions of high productivity with slow ventilation rates [8], dissolved oxygen concentrations at lower depths  
59 drop to very low levels, these regions are referred to as oxygen minimum zones (OMZ). The differential solubility of  
60 oxygen and consumption via microbial-mediated oxidative processes are also known to affect the oxygen  
61 concentration in marine water.

62 In oceanic OMZ areas, anaerobic respiration by microbes includes use of alternative electron acceptors such as nitrate  
63 and sulfate [7]. Thus, presence of OMZ areas influences the chemical composition of the water and induces stress on  
64 organisms including alterations in the food web structure [8, 9]. For instance, total reduction of nitrogen and release  
65 of nitrogen gas by microbes removes the fixed nitrogen from marine ecosystem [8]. Similarly, sulfur (S) reduction  
66 produces hydrogen sulfide and increasing the toxicity of surrounding environment [10, 11]. The Indian Ocean, the  
67 Arabian Sea and Bay of Bengal covers the 59% of the total global OMZ area [12]. Some previous studies on OMZ  
68 have concentrated primarily on the diversity of microorganisms in waters/sediments from Arabian sea [13–15] and  
69 Bay of Bengal [16–21]. In addition, the identified cultivable bacteria during algal blooms in AS region were shown  
70 to have denitrifying capability, indicating relationship between water column characteristic and microbial diversity  
71 [22]. Additionally presence of active nitrogen cycle [23–25], sulfate reduction [26] and methane metabolism [27] from  
72 Arabian sea have been reported. In a recent study [28] where abundance of microbial genes associated with  $\text{N}_2$   
73 production have been quantified which supported the presence of denitrifiers and anammox microbial population in  
74 Bay of Bengal OMZ area. BOB –OMZ is weaker due to less detritus along the western boundary [29] than AS-OMZ.  
75 Unlike Arabian sea, Bay of Bengal receives immense fresh water runoff as well as average sediment load ( $1.1 \times 10^9$   
76 tonnes) [30, 31] from major rivers. Thus, overall AS-OMZ and BOB-OMZ differ in various aspects including salinity,  
77 DO concentrations and sediment load.

78 Denitrification is a dissimilatory process which involves the oxidized nitrogen compounds as alternative electron  
79 acceptors for energy production during very low oxygen concentration. Nitrogen oxides are reduced to gaseous  
80 products ( $\text{NO}$ ,  $\text{N}_2\text{O}$ , and  $\text{N}_2$ ) which are released, leading to a loss of fixed nitrogen to the environment. In marine  
81 coastal sediments, denitrification removes 40 to 50% of external inputs of dissolved inorganic matter [32] resulting in  
82 an unbalanced nitrogen budget in the ocean [33, 34]. Accumulation of  $\text{NO}$  and  $\text{N}_2\text{O}$  contributes to global warming  
83 and the destruction of the ozone layer. Also the mangrove studies reveals that the anthropogenic activities lead to the

84 bioaccumulation of different metals which in turn affects its associated biota [35]. Thus, there is a need for  
85 understanding the community of denitrifying bacteria as they influence the environmental conditions.

86 In addition to 16S rDNA, several functional genes were shown to be useful in the investigation of microbial  
87 communities [36–38]. Functional genes provide a resolution below species level and this approach may indicate  
88 functional diversity in the environment. An approach involving 16S rDNA alone does not appear to be suitable to  
89 investigate communities of denitrifying bacteria, as denitrification is widespread among phylogenetically unrelated  
90 groups [39]. Present study investigates the cultivable bacterial diversity from OMZ and non-OMZ areas of AS and  
91 BOB. Microorganisms have been cultured and characterized based on 16SrRNA sequencing. Further functional  
92 characterization includes the substrate utilizing properties. Hence this study deals with comparative taxonomic as well  
93 as different substrate utilization properties of cultivable bacteria from Indian OMZ and Non-OMZ areas. .

## 94 **2. Materials and Methods**

### 95 **2.1. Sample collection and isolation of microorganisms**

96 Water samples from OMZ and Non-OMZ regions of Arabian Sea and Bay of Bengal were collected in Apr/May 2015  
97 (Cruise No. 340,) and in December 2015 (Cruise No. 346) Sagar Sampada, CMLRE, MOES respectively. CTD  
98 profiler was used for collection of Water samples and measuring the DO concentration.

99 Water samples (100µl) were spread on Zobell's media containing 5% sea salt and incubated at 12°C in dark for 7  
100 days. Morphologically different colonies were isolated and purified. These pure single isolates were then used for  
101 subsequent analysis including Gram staining and substrate utilization assays. Isolates were also examined for their  
102 growth at 12°C and 37°C temperature so as to find out the optimum temperature required for their growth.

### 103 **2.2. Identification of microorganisms**

104 In total, 40 single colonies from Arabian Sea and 31 distinct single colonies from Bay of Bengal were isolated. From  
105 all the 71 colonies genomic DNA was isolated using QIAprep® kit according to the manufactures protocol. This was  
106 followed by 16S rRNA PCR using 27F in combination with1492R/1390R/519R set of primers (Online resource 1).  
107 Total 25 µl of total PCR reaction with 1 µl DNA (50–100 ng), 1 µl each of primers (10 pmol µl<sup>-1</sup>), 2.5 µl 10× Taq  
108 polymerase buffer (Promega), 0.5 U Taq DNA polymerase (Promega) and 200 µM of each dNTPs (Promega) was set  
109 up. The PCR conditions were, 5min at 95°C for initial denaturation, 35 cycles of 30 s at 95°C, 45 s at 48°C or at 55°C,  
110 120 s at 72°C and a final extension for 10 min at 72°C. PCR product was checked using 1% agarose gel electrophoresis  
111 and purified using Promega (A9282) kit according to manufacturer's instructions. Sanger dideoxy method was used  
112 for sequencing all the PCR products of 16S rDNAand the taxonomic identification of each bacteria was carried out  
113 using NCBI BLAST tool.

114

## 115 **2.3. Screening for ability to use different Substrates**

### 116 **2.3.1. Enzyme Assays**

117 All the 71 isolates were screened for extracellular production of amylase, xylanase, agarase, cellulase and chitinase  
118 enzymes. For agarase and amylase, 1% agar and 1% starch plates were used, respectively and clear zones produced  
119 by the isolates were identified using Gram's iodine with potassium iodide staining. For cellulose, 1% CMC and for  
120 xylanase, 1% Birchwood xylan plates were used and clear zones were observed after 2/3 days using Congored. For  
121 Chitinase assay, 1% colloidal chitin plates were used and clear zones were directly observed after 3 days of incubation.  
122 Bacterial isolates which showed clear zones in plate assays were used for colorimetric quantitative assays for amylase,  
123 xylanase and cellulase. Initially, the cultures were grown in minimal medium using 1% soluble starch, 1% birch-wood  
124 xylan and 1% CMC as a sole carbon source for amylase, xylanase and cellulase, respectively. After 72 hrs of  
125 incubation, cell free supernatant was used for colorimetric assay. For cellulase, xylanase and amylase assay 20µl of  
126 1% CMC, 1% xylan and 1% starch was added in 96 well plate with 20µl cell supernatant from each isolate. Plates  
127 were incubated for 1hr. Further 160µl of DNS solution was added in each well and incubated at 100°C for 20 min  
128 followed by reading at 570nm in multimode plate reader (Perkin Elmer). All the quantitative assays were done in  
129 triplicates and the activity was estimated using the standard graph of glucose.

### 130 **2.3.2. Hydrocarbon degradation**

131 For Hydrocarbon degradation assay, isolates were grown in Bushnell-Hass medium (Himedia- M350) with kerosene  
132 as a sole carbon source. Microbes which were able to grow in this medium were considered as positive for kerosene  
133 degradation.

### 134 **2.3.3. Biochemical Test for Carbohydrate utilization**

135 Carbohydrate utilization kit (HiCarbo™KB009) containing 35 different carbohydrates was used to study the  
136 utilization of different carbohydrates. The kit contains 35 wells of different carbohydrates with a negative control.  
137 50µl of freshly grown culture was inoculated in each well and color change was observed according to the  
138 manufactures instructions.

### 139 **2.3.4. Sulfur Reduction Test**

140 Barr's medium was used to test the sulfur reducing capacity of different isolates. The medium contains different sulfate  
141 salts which turn black when utilized by any organisms. Isolates were inoculated in 10 ml of medium and kept in dark.  
142 Color change from white to black indicated the positive reaction and confirmed the sulfur reduction. *Desulfovibrio*  
143 *desulfuricans* was used as a positive control.

### 144 **2.3.5. Nitrate reduction test**

145 Nitrate reducing ability was assessed by Nitrate/Nitrite colorimetric assay kit (780001) from “Cayman Chemicals”  
146 with slight modification in manufactures protocol. Bacterial culture was suspended in 500µl of 1X PBS buffer,  
147 lysozyme (400µg/ml) was added in each tube followed by sonication. Samples were incubated at 37°C for 1hr and  
148 centrifuged at 14,000 rpm for 20 min at 4°C. Supernatant was removed and protein concentration was quantified. Total  
149 cell protein (50 µg) for each sample was used along with 80µl of assay buffer (from the kit). Then 20µl of Nitrate  
150 standard (From Kit, concentration) was added in each well. Assay plate was incubated at RT in dark for 1hr, 50µl of  
151 Griess reagent I followed by 50µl of Griess reagent II was added in each well and colour development was observed.  
152 If pink color appeared, it indicated the presence of nitrite and the test was considered positive. In case no colour  
153 developed, pinch of zinc dust was added to the well. Development of colour after addition of zinc showed that nitrate  
154 was not reduced and the test is negative but if no colour appeared, it indicated the total reduction of nitrate and  
155 confirmed that nitrogen is released from the sample indicating positive test.

## 156 **2.4. Antibiotic resistance**

157 All seventy-one isolates were screened for Ampicillin, Chloramphenicol, Streptomycin and Kanamycin resistance by  
158 disc diffusion method. Bacterial culture (100µL) was spread on Zobell’s agar plate and discs were placed on the plate.  
159 On discs, 10 µL of each antibiotic (100µg/mL concentration) was added. Presence of clear zone around disc after  
160 overnight incubation indicated sensitivity to antibiotic.

## 161 **3. Results and Discussion**

### 162 **3.1. Cultivable microbes from AS and BOB OMZ-Non-OMZ area**

163 Initial screening of samples led to the identification of 71 distinct types of microbes (Online resource 2). Detailed  
164 sampling information of the water samples collected from AS and BOB has been mentioned in Table I. Isolates were  
165 examined for their growth at two different temperature i.e. 12°C and 37°C and it was observed that all the isolates  
166 were able to grow on both the temperature. Interestingly it was observed that at 12°C the growth was much slower  
167 than at 37°C. In future studies however, it will be interesting to understand the metabolic difference in bacteria grown  
168 at these temperatures.

169 The bacteria were characterized and subjected to 16S rRNA sequencing followed by BLASTn homology search. All  
170 these 16S rRNA sequences were deposited in NCBI GenBank under accession numbers MH217583, MH256039 to  
171 MH256108 (Table II). Each 16S rRNA was subjected to MEGA6 analysis with 10 iterations and 1000 bootstraps to  
172 identify phylogenetic relationship. 16S rRNA based analysis has identified 71 bacteria belonging to genus  
173 *Halomonas*, *Marinobacter*, *Idiomarina*, *Pshyctobacter*, *Pseudoalteromonas* along with two more which are  
174 represented only by the single sequences those were *Thallassospira* (in Bay of Bengal) and *Paenibacillus* (in Arabian  
175 sea). In case of both Arabian Sea and Bay of Bengal the distribution was not specific with respect to either depth,  
176 collection site and oxygen concentrations. For example, bacteria from genus *Halomonas* or *Pseudoalteromonas* could  
177 be isolated from almost all samples in BOB and AS waters. However, some bacteria like *Thallassospira* was observed

178 only at BOB waters and bacteria from genus *Paenibacillus* was isolated only from AS. Thus, the initial 16SrRNA  
179 analysis revealed that from AS in total 6 genera while from BOB bacteria belonging to 2 genera were successfully  
180 cultured, indicating greater diversity in AS than BOB.

### 181 **3.2. Characteristics of bacteria**

182 *Halomonas spp.* has been isolated from hydrocarbon contaminated industrial brine [40], sea water [41], hypersaline  
183 lake, hydrothermal vent, saltern fermented food. Members of this genus are involved in bioremediation process [41],  
184 some *spp.* can produce biosurfactants. We could identify different *Halomonas* species such as *Halomonas*  
185 *aquamarina*, *Halomonas axialensis*, *Halomonas meridiana* and *Halomonas denitrificans* from different location and  
186 water depths. Few of these bacteria were reported to have specific characteristics that can be useful in various  
187 applications. Such as *Halomonas axialensis* has been shown to reduce nitrate in both aerobic and anaerobic condition  
188 and is also oxidase positive [42]. It is known to harbor 20 aldehyde dehydrogenase genes involved in 14 metabolic  
189 pathways of aldehyde degradation[43]. *Halomonas meridiana* has genes such as choline dehydrogenase and betaine  
190 aldehyde dehydrogenase which are responsible for production of osmo-protectants. Genes responsible for osmolyte,  
191 ecotine production (ectABC) and for utilization of ecotine (eutED) have also reported in its genome [44].

192 Many bacteria from *Marinobacter* genus were also isolated from BOB and AS waters. Interestingly, many species  
193 from *Marinobacter* genus are known to degrade petroleum and a few can tolerate metalloids. One of the isolate was  
194 identified as *Marinobacter hydrocarbonoclasticus* which is known to grow on aromatic hydrocarbons and can produce  
195 extracellular surface-active compound by forming biofilm on n-alkanes, fatty alcohols, apolar lipids, wax esters and  
196 triglycerides. Another isolate *Thalassospira tepidiphila* was initially found in petroleum-contaminated seawater and  
197 was reported to degrade polycyclic aromatic hydrocarbons. It also shows degradation of naphthalene, phenanthrene,  
198 dibenzothiophene and fluorene (mixed into crude oil) [45]. We have also isolated *Pseudoalteromonas shioyasakiensis*  
199 which was reported to show halo-alkali and thermo tolerant properties in addition to chitinase production [46]. Same  
200 *spp.* isolated from Indonesian marine areas, shows polyaromatic hydrocarbon degradation activity. In current report,  
201 some of the isolates of *Pseudoalteromonas* were seen to possess hydrocarbon degradation property. Few microbes  
202 from *Idiomarina* genus were also identified and bacteria from this genus are known for their chitin degradation activity  
203 and production of biodiesel from *Jatropha* oil [47]. Thus, microbes isolated from Arabian Sea and Bay of Bengal  
204 belong to various genus and species which were reported to have many industrial and biological applications.  
205 Therefore these isolates were further assessed for various chemical and enzymatic properties.

### 206 **3.3. Carbohydrate utilizing ability of bacteria**

207 Carbohydrates are important part of a global carbon cycle. Marine surface water contains up to 21% carbohydrates in  
208 the form of dissolved organic carbon. Polysaccharides and monosaccharide are reported to be present at for 3-4  $\mu\text{M}$   
209 concentration in Pacific, Atlantic and Antarctic Ocean [48]. Carbohydrate utilization is a central pathway for energy  
210 production in bacteria (Aluwihare and Repeta, 1999; Arnosti, 2000, Zoppini et al, 2010). Marine heterotrophic bacteria  
211 contribute carbon cycle either by the remineralisation of organic carbon or by the production of new bacterial biomass.

212 Previous reports have demonstrated the presence of carbohydrate degrader's, belonging to *Bacillus* , *Vibrio*,  
213 *Marinobacter*, etc from estuarine sources near Arabian sea [45]. The characteristic ability of microorganisms to utilise  
214 different carbon sources is important in the understanding the marine microbial ecology [49]. Among the bacterial  
215 isolates, most of the bacteria were able to utilize multiple carbohydrates while only a few bacteria (C1 from AS and  
216 A13, A16 and A23 from BOB) were unable utilize any carbohydrate (Online resource 3). Further, amongst Bay of  
217 Bengal isolates, citrate was preferentially used followed by malonate (Fig 1). While Arabian Sea isolates were  
218 observed to utilize more complex carbohydrates such as esculin and malonate (Online resource 3). This underlines the  
219 basic difference between energy production pathways and complexity of the bacterial metabolic abilities between  
220 various isolates from two different Indian oceans. Further a few microbes were observed to utilize only one carbon  
221 source, namely, A1 (*Halomonas sp. MCCB 340*), A3 (*Halomonas meridiana* strain NIOSSD020#411), A4  
222 (*Marinobacter hydrocarbonoclasticus* strain ss36) from BOB utilized citrate as a carbon source (Online resource 3)  
223 while G3 (*Pseudoalteromonas shioyasakiensis* strain QY19), K10 (*Pseudoalteromonas sp. Bac186*), M1  
224 (*Pseudoalteromonas shioyasakiensis* strain SE3), M2 (*Halomonas sp.*), M4 (*Idiomarina sp. PR53*), M6  
225 (*Pseudoalteromonas shioyasakiensis* strain SE3) and T2 (*Halomonas sp. whb34*) could use single carbohydrate for  
226 energy production (Online resource 3). Thus, it could be observed that similar type of bacteria isolated from two  
227 different location or conditions have entirely different preferences for carbon sources and energy production pathways.

### 228 **3.4. Enzyme assays**

229 Ocean contains several carbon sources as nutrients. Most of the primary production in marine environments goes into  
230 the detrital food which is consumed by heterotrophic microorganisms. The complex macromolecular detritus must be  
231 degraded initially into simpler substrates by enzymes which can be utilized by other living organisms. These  
232 extracellular enzymes are released into the environment either by secretion or to some extent by cell lysis [50, 51]. In  
233 addition to microbial diversity, the types of extracellular enzymes, their magnitude and nature can reflect the probable  
234 consumption and diversity of available organic matter in a particular ecosystem. Both aerobic and anaerobic bacteria  
235 are known to produce such extracellular enzymes degrade organic matter [52]. Aerobic heterotrophic bacteria often  
236 possess degradative pathways for structurally complex organic matter [52–54] and thus can play a significant role in  
237 maintenance of nutrient cycling. From this study, we report that in both Bay of Bengal and Arabian Sea amylase,  
238 agarase producers and hydrocarbon utilizing micro-organisms are predominant in number. Among the 71 isolates, 42  
239 isolates showed amylase activity (Fig 2 Online resource 4) and 17 isolates showed agarase activity (Fig 2, Online  
240 resource 4).

241 Further, 6 isolates from BOB (Fig 2, Online resource 4) and 28 from AS (Fig 2, Online resource 4) also showed  
242 cellulose utilizing capability (Fig 2). In comparison, microbes with chitinase and xylanase activity were less in number  
243 (Fig 2, Online resource 4). Groups of the micro-organisms known as the hydrocarbonoclastic bacteria (HCB) play an  
244 important role in the biodegradation and removal of petrochemical pollutants in the global ocean. Oil spill is one of  
245 the serious issues among the contaminants in the ocean where the presence and activities of these bacteria has been  
246 detected. Oil (hydrocarbons) is spilled in the ocean from the ships. Thus, in addition to bacterial diversity, evaluating



247 the ability of bacteria to utilize various organic substrates is an important aspect to understand the functional marine  
248 ecology. Over 175 genera, distributed across several major bacterial classes such as Alpha, Beta, and  
249 Gammaproteobacteria, Actinomycetes, Flavobacteria include representatives of HCB species [55]. Out of 71 isolates,  
250 32 bacteria showed promising hydrocarbon utilization activity (Fig 2, Online resource 4).

251 In OMZ regions, organisms are known to use nitrate and sulfate as a terminal electron acceptor and as one of the  
252 energy sources. 3 isolates from AS demonstrated sulfur reduction ability (Fig 2, Online resource 4) whereas 2 from  
253 BOB and 3 from AS showed nitrate reduction activity (Fig 2, Online resource 4). Among all the isolates, very few  
254 isolates show multiple enzymatic activities. A1 (*Halomonas* sp. MCCB 340) from Bay of Bengal was hydrocarbon  
255 degrading as well as had nitrate and sulfur reducing activity (Fig 2, Online resource 4). Enzymatic activities of each  
256 isolates from BOB & AS are summarized (Fig 2, Online resource 4). A recent study from the Arabian sea, also  
257 suggested that some bacteria are capable for complete nitrate reduction [56]. Bacteria of from genera such as  
258 *Halomonas* and *Pseudoalteromonas* are known to be involved in nitrogen cycle [57, 58]. *Pseudoalteromonas*,  
259 *Halomonas* and *Paenibacillus* species are well known for nitrate reduction, with the presences of NirS gene [59–61].  
260 In addition, presences of denitrification process, supporting the presences of denitrifier microbial populations in BOB  
261 and Arabian sea regions, is recently reported [28, 56]. Also, a metagenomics analysis of OMZ and non-OMZ regions  
262 of Bay Bengal suggests the difference in bacterial abundance. Functional analysis revealed the presence of  
263 assimilatory Sulphur reducing genes in the non-OMZ areas whereas the dissimilatory sulphate reducing genes were  
264 abundant in OMZ regions. Also, our study has revealed the distinct bacterial diversity of Bay of Bengal when  
265 compared to OMZ regions of Peru and Chile. This work also reports the presence of bacteria involved in nitrogen  
266 metabolism [62]. Therefore, current analysis with support from the previous studies confirms the presences of nitrate  
267 reducing cultivable bacteria in BOB and Arabian Sea areas.

### 268 **3.5. Antibiotic assay**

269 Bacteria acquire antibiotic resistance naturally or through horizontal gene transfer from other organisms and by contact  
270 with antimicrobial agents. Many of the isolates were found to resist higher concentration (100µg/mL) of ampicillin,  
271 chloramphenicol, kanamycin and streptomycin antibiotics. Ampicillin susceptibility to 100µg/mL concentration was  
272 only shown by 9 AS bacteria and 20 BOB bacteria (Fig 3, Online resource 5) and a few were weakly resist 100µg/mL  
273 concentration of ampicillin and chloramphenicol respectively (Fig 3, Online resource 5). Susceptibility to 100µg/mL  
274 concentration of chloramphenicol was shown by 11 bacterial isolates from AS and 1 bacterial isolate (BOB).  
275 Resistance to 100µg/mL kanamycin and streptomycin was detected in all 71 isolates (Fig 3). Therefore, our results  
276 revealed that AS and BOB is reservoir of chloramphenicol, kanamycin and streptomycin resistant bacteria and this  
277 genetic trait is predominant in these isolates.

278 The OMZ and Non-OMZ areas of the Indian Ocean thus harbor diverse bacteria with different catabolic efficiencies.  
279 In conclusion, current study has identified 71 distinct bacteria from AS and BOB water samples which differ in  
280 dissolved oxygen concentration. The identified bacteria belong to different genera and species which have varied  
281 physical and biochemical properties including carbohydrate utilization, hydrocarbon utilization. The supply of organic

282 material to the OMZ and Non-OMZ water column is an important factor as macro- as well as micro- life forms survive  
283 on this organic matter. Therefore, future studies including detailed investigation of currently identified cultivable  
284 bacteria and their potential applications and exploration of more bacterial diversity from Indian Ocean is warranted  
285 and is likely to provide rich and diverse microbial populations. Also, this study identifies the denitrifying microbial  
286 population which will be useful in studying the nitrogen cycle in the Arabian Sea and Bay of Bengal. Overall, the  
287 current study provides basic identification of bacterial diversity and their characterization in Indian oceans.

## 288 **Acknowledgments**

289 This work was funded by Ministry of Earth Sciences (MoES), Government of India, under the Microbial  
290 Oceanography scheme. The funding agency had no role in study design, data collection and analysis, decision to  
291 publish, or preparation of the manuscript. The authors acknowledge support from Dr. Somasundar of MOES.

## 292 **Author contributions**

293 DDD, SNR and MP designed the experiments; YMP, RB, AMK and PGM carried out the wet lab work; SNR, YMP,  
294 RB, carried out bioinformatics and statistical analysis, DDD and SNR interpreted the results and wrote the manuscript.

## 295 **Funding and Acknowledgments**

296 This work was funded by Ministry of Earth Sciences (MoES), Government of India, under the Microbial  
297 Oceanography scheme to DDD. The funding agency had no role in study design, data collection and analysis, decision  
298 to publish, or preparation of the manuscript. Authors acknowledge Mr. Suraj Joshi, who helped in water sample  
299 collection. This project was coordinated through CMLRE and we acknowledge the help and support from Dr.  
300 Saravannane, Dr. Cherayi, Dr. Shivaji and Director of CMLRE, Dr. Sudhakar.

301

302 **Conflict of Interest:** The authors declare that they have no conflict of interest.

303

## 304 **References**

- 305 1. Satheesh S, Ba-akdah MA, Al-Sofyani AA (2016) Natural antifouling compound production by  
306 microbes associated with marine macroorganisms: A review. *Electronic Journal of Biotechnology*  
307 19:26–35
- 308 2. Armstrong E, Yan L, Boyd KG, et al (2001) The symbiotic role of marine microbes on living surfaces.  
309 *Hydrobiologia* 461:37–40
- 310 3. Debbab A, Aly AH, Lin WH, Proksch P (2010) Bioactive compounds from marine bacteria and fungi.  
311 *Microbial biotechnology* 3:544–563

- 312 4. Thakur AN, Thakur NL, Indap MM, et al (2005) Antiangiogenic, antimicrobial, and cytotoxic potential  
313 of sponge-associated bacteria. *Marine Biotechnology* 7:245–252
- 314 5. Zheng L, Han X, Chen H, et al (2005) Marine bacteria associated with marine macroorganisms: the  
315 potential antimicrobial resources. *Annals of Microbiology* 55:119–124
- 316 6. Hu Y, Chen J, Hu G, et al (2015) Statistical Research on the Bioactivity of New Marine Natural  
317 Products Discovered during the 28 Years from 1985 to 2012. *Marine Drugs* 13:202–221.  
318 <https://doi.org/10.3390/md13010202>
- 319 7. Lam P, Kuypers MMM (2011) Microbial Nitrogen Cycling Processes in Oxygen Minimum Zones.  
320 *Annual Review of Marine Science* 3:317–345. <https://doi.org/10.1146/annurev-marine-120709-142814>  
321
- 322 8. Meyerhof MS, Wilson JM, Dawson MN, Michael Beman J (2016) Microbial community diversity,  
323 structure and assembly across oxygen gradients in meromictic marine lakes, Palau: Microbial  
324 communities in meromictic marine lakes. *Environmental Microbiology* 18:4907–4919.  
325 <https://doi.org/10.1111/1462-2920.13416>
- 326 9. Anas A, Nilayangod C, Jasmin C, et al (2016) Diversity and bioactive potentials of culturable  
327 heterotrophic bacteria from the surficial sediments of the Arabian Sea. *3 Biotech* 6:238
- 328 10. Bakun A, Field DB, Redondo-Rodriguez ANA, Weeks SJ (2010) Greenhouse gas, upwelling-favorable  
329 winds, and the future of coastal ocean upwelling ecosystems. *Global Change Biology* 16:1213–1228
- 330 11. Lavik G, Stührmann T, Brüchert V, et al (2009) Detoxification of sulphidic African shelf waters by  
331 blooming chemolithotrophs. *Nature* 457:581
- 332 12. Gibson RN, Atkinson RJA (2003) Oxygen minimum zone benthos: adaptation and community  
333 response to hypoxia. *Oceanogr Marine Biol Annu Rev* 41:1–45
- 334 13. Bryant JA, Stewart FJ, Eppley JM, DeLong EF (2012) Microbial community phylogenetic and trait  
335 diversity declines with depth in a marine oxygen minimum zone. *Ecology* 93:1659–1673
- 336 14. Divya B, Parvathi A, Bharathi PL, Nair S (2011) 16S rRNA-based bacterial diversity in the organic-rich  
337 sediments underlying oxygen-deficient waters of the eastern Arabian Sea. *World Journal of*  
338 *Microbiology and Biotechnology* 27:2821–2833
- 339 15. Divya B, Soumya KV, Nair S (2010) 16SrRNA and enzymatic diversity of culturable bacteria from the  
340 sediments of oxygen minimum zone in the Arabian Sea. *Antonie van Leeuwenhoek* 98:9–18
- 341 16. Das S, Lyla PS, Khan SA (2007) Spatial variation of aerobic culturable heterotrophic bacterial  
342 population in sediments of the continental slope of western Bay of Bengal. *Indian Journal of Marine*  
343 *Sciences* 36:51–58
- 344 17. De J, Sarkar A, Ramaiah N (2006) Bioremediation of toxic substances by mercury resistant marine  
345 bacteria. *Ecotoxicology* 15:385–389

- 346 18. Nithya C, Pandian SK (2010) Isolation of heterotrophic bacteria from Palk Bay sediments showing  
347 heavy metal tolerance and antibiotic production. *Microbiological Research* 165:578–593
- 348 19. Ramesh S, Jayaprakashvel M, Mathivanan N (2006) Microbial status in seawater and coastal  
349 sediments during pre-and post-tsunami periods in the Bay of Bengal, India. *Marine Ecology* 27:198–  
350 203
- 351 20. Ruban P, Gunaseelan C (2011) Antibiotic resistance of bacteria from Krishna Godavari Basin, Bay of  
352 Bengal, India. *Environmental and Experimental Biology* 9:33–136
- 353 21. Santhiya G, Lakshumanan C, Selvin J, Asha D (2011) Microbiological analysis of seawater and  
354 sediments in urban shorelines: Occurrence of heavy metals resistance bacteria on Chennai beaches,  
355 Bay of Bengal. *Microchemical Journal* 99:197–202
- 356 22. Basu S, Deobagkar DD, Matondkar SP, Furtado I (2013) Culturable Bacterial Flora Associated with  
357 the Dinoflagellate Green *Noctiluca miliaris* During Active and  
358 Declining Bloom Phases in the Northern Arabian Sea. *Microb Ecol* 65:934–954.  
359 <https://doi.org/10.1007/s00248-012-0148-1>
- 360 23. Paulmier A, Ruiz-Pino D (2009) Oxygen minimum zones (OMZs) in the modern ocean. *Progress in*  
361 *Oceanography* 80:113–128. <https://doi.org/10.1016/j.pocean.2008.08.001>
- 362 24. Pitcher A, Villanueva L, Hopmans EC, et al (2011) Niche segregation of ammonia-oxidizing archaea  
363 and anammox bacteria in the Arabian Sea oxygen minimum zone. *The ISME journal* 5:1896
- 364 25. Wyman M, Hodgson S, Bird C (2013) Denitrifying alphaproteobacteria from the Arabian Sea that  
365 express *nosZ*, the gene encoding nitrous oxide reductase, in oxic and suboxic waters. *Applied and*  
366 *environmental microbiology* 79:2670–2681
- 367 26. Böttcher ME, Schale H, Schnetger B, et al (2000) Stable sulfur isotopes indicate net sulfate reduction  
368 in near-surface sediments of the deep Arabian Sea. *Deep Sea Research Part II: Topical Studies in*  
369 *Oceanography* 47:2769–2783. [https://doi.org/10.1016/S0967-0645\(00\)00048-5](https://doi.org/10.1016/S0967-0645(00)00048-5)
- 370 27. Lüke C, Speth DR, Kox MA, et al (2016) Metagenomic analysis of nitrogen and methane cycling in the  
371 Arabian Sea oxygen minimum zone. *PeerJ* 4:e1924
- 372 28. Bristow LA, Callbeck CM, Larsen M, et al (2017) N<sub>2</sub> production rates limited by nitrite availability in  
373 the Bay of Bengal oxygen minimum zone. *Nature Geoscience* 10:24–29.  
374 <https://doi.org/10.1038/ngeo2847>
- 375 29. McCreary JP, Yu Z, Hood RR, et al (2013) Dynamics of the Indian-Ocean oxygen minimum zones.  
376 *Progress in Oceanography* 112–113:15–37. <https://doi.org/10.1016/j.pocean.2013.03.002>
- 377 30. Milliman JD, Meade RH (1983) World-Wide Delivery of River Sediment to the Oceans. *The Journal of*  
378 *Geology* 91:1–21. <https://doi.org/10.1086/628741>
- 379 31. Milliman JD, Syvitski JPM (1992) Geomorphic/Tectonic Control of Sediment Discharge to the Ocean:  
380 The Importance of Small Mountainous Rivers. *The Journal of Geology* 100:525–544.  
381 <https://doi.org/10.1086/629606>

- 382 32. Seitzinger SP (1990) Denitrification In Aquatic Sediments. In: Denitrification in Soil and Sediment.  
383 Springer, Boston, MA, pp 301–322
- 384 33. Devol AH (1991) Direct measurement of nitrogen gas fluxes from continental shelf sediments.  
385 Nature 349:319–321. <https://doi.org/10.1038/349319a0>
- 386 34. Morrison JM, Codispoti LA, Smith SL, et al (1999) The oxygen minimum zone in the Arabian Sea  
387 during 1995. Deep Sea Research Part II: Topical Studies in Oceanography 46:1903–1931.  
388 [https://doi.org/10.1016/S0967-0645\(99\)00048-X](https://doi.org/10.1016/S0967-0645(99)00048-X)
- 389 35. Kulkarni R, Deobagkar D, Zinjarde S (2018) Metals in mangrove ecosystems and associated biota: A  
390 global perspective. Ecotoxicology and Environmental Safety 153:215–228.  
391 <https://doi.org/10.1016/j.ecoenv.2018.02.021>
- 392 36. Pichard SL, Campbell L, Paul JH (1997) Diversity of the ribulose biphosphate carboxylase/oxygenase  
393 form I gene (rbcL) in natural phytoplankton communities. Appl Environ Microbiol 63:3600–3606
- 394 37. Rotthauwe JH, Witzel KP, Liesack W (1997) The ammonia monooxygenase structural gene amoA as  
395 a functional marker: molecular fine-scale analysis of natural ammonia-oxidizing populations. Appl  
396 Environ Microbiol 63:4704–4712
- 397 38. Ueda T, Suga Y, Yahiro N, Matsuguchi T (1995) Remarkable N<sub>2</sub>-fixing bacterial diversity detected in  
398 rice roots by molecular evolutionary analysis of nifH gene sequences. J Bacteriol 177:1414–1417.  
399 <https://doi.org/10.1128/jb.177.5.1414-1417.1995>
- 400 39. Jüngst Angelika, Zumft Walter G. (2001) Interdependence of respiratory NO reduction and nitrite  
401 reduction revealed by mutagenesis of nirQ, a novel gene in the denitrification gene cluster of  
402 *Pseudomonas stutzeri*. FEBS Letters 314:308–314. [https://doi.org/10.1016/0014-5793\(92\)81495-8](https://doi.org/10.1016/0014-5793(92)81495-8)
- 403 40. Carlson RP, Oshota O, Shipman M, et al (2016) Integrated molecular, physiological and in silico  
404 characterization of two *Halomonas* isolates from industrial brine. Extremophiles 20:261–274.  
405 <https://doi.org/10.1007/s00792-015-0806-6>
- 406 41. Gasperotti AF, Studdert CA, Revale S, Herrera Seitz MK (2015) Draft Genome Sequence of  
407 *Halomonas* sp. KHS3, a Polyaromatic Hydrocarbon-Chemotactic Strain. Genome Announcements  
408 3:e00020-15. <https://doi.org/10.1128/genomeA.00020-15>
- 409 42. Jiang J, Pan Y, Hu S, et al (2014) *Halomonas songnenensis* sp. nov., a moderately halophilic bacterium  
410 isolated from saline and alkaline soils. International Journal of Systematic and Evolutionary  
411 Microbiology 64:1662–1669. <https://doi.org/10.1099/ijs.0.056499-0>
- 412 43. Ye J, Ren C, Shan X, Zeng R (2016) Draft Genome Sequence of Aldehyde-Degrading Strain *Halomonas*  
413 *axialensis* ACH-L-8. Genome announcements 4:e00287–16
- 414 44. Meyer JL, Dillard BA, Rodgers JM, et al (2015) Draft genome sequence of *Halomonas meridiana* R1t3  
415 isolated from the surface microbiota of the Caribbean Elkhorn coral *Acropora palmata*. Standards in  
416 Genomic Sciences 10:. <https://doi.org/10.1186/s40793-015-0069-y>

- 417 45. Khandeparker R, Verma P, Meena RM, Deobagkar DD (2011) Phylogenetic diversity of carbohydrate  
418 degrading culturable bacteria from Mandovi and Zuari estuaries, Goa, west coast of India. *Estuarine,*  
419 *Coastal and Shelf Science* 95:359–366. <https://doi.org/10.1016/j.ecss.2011.09.004>
- 420 46. Makhdoumi A, Dehghani-Joybari Z, Mashreghi M, et al (2015) A novel halo-alkali-tolerant and  
421 thermo-tolerant chitinase from *Pseudoalteromonas* sp. DC14 isolated from the Caspian Sea.  
422 *International Journal of Environmental Science and Technology* 12:3895–3904.  
423 <https://doi.org/10.1007/s13762-015-0848-4>
- 424 47. Li X, Qian P, Wu S-G, Yu H-Y (2014) Characterization of an organic solvent-tolerant lipase from  
425 *Idiomarina* sp. W33 and its application for biodiesel production using *Jatropha* oil. *Extremophiles*  
426 18:171–178. <https://doi.org/10.1007/s00792-013-0610-0>
- 427 48. Wiegmann K, Hensler M, Wohlbrand L, et al (2014) Carbohydrate Catabolism in *Phaeobacter*  
428 *inhibens* DSM 17395, a Member of the Marine *Roseobacter* Clade. *Applied and Environmental*  
429 *Microbiology* 80:4725–4737. <https://doi.org/10.1128/AEM.00719-14>
- 430 49. Giorgio PA del, Cole JJ (1998) Bacterial Growth Efficiency in Natural Aquatic Systems. *Annual Review*  
431 *of Ecology and Systematics* 29:503–541. <https://doi.org/10.1146/annurev.ecolsys.29.1.503>
- 432 50. Arnosti C (2011) Microbial Extracellular Enzymes and the Marine Carbon Cycle. *Annual Review of*  
433 *Marine Science* 3:401–425. <https://doi.org/10.1146/annurev-marine-120709-142731>
- 434 51. Sinsabaugh RL, Shah JF (2012) Ecoenzymatic Stoichiometry and Ecological Theory. *Annual Review*  
435 *of Ecology, Evolution, and Systematics* 43:313–343. <https://doi.org/10.1146/annurev-ecolsys-071112-124414>
- 437 52. Hall Robert O., Meyer Judy L. (1998) The trophic significance of bacteria in a detritus-based stream  
438 food web. *Ecology* 79:1995–2012. [https://doi.org/10.1890/0012-9658\(1998\)079\[1995:TTSOBI\]2.0.CO;2](https://doi.org/10.1890/0012-9658(1998)079[1995:TTSOBI]2.0.CO;2)
- 440 53. Hedges JI, Keil RG (1995) Sedimentary organic matter preservation: an assessment and speculative  
441 synthesis. *Marine Chemistry* 49:81–115. [https://doi.org/10.1016/0304-4203\(95\)00008-F](https://doi.org/10.1016/0304-4203(95)00008-F)
- 442 54. Mayer LM (1994) Relationships between mineral surfaces and organic carbon concentrations in soils  
443 and sediments. *Chemical Geology* 114:347–363. [https://doi.org/10.1016/0009-2541\(94\)90063-9](https://doi.org/10.1016/0009-2541(94)90063-9)
- 444 55. Prince RC, Gramain A, McGenity TJ (2010) Prokaryotic Hydrocarbon Degradation. In: *Handbook of*  
445 *Hydrocarbon and Lipid Microbiology*. Springer, Berlin, Heidelberg, pp 1669–1692
- 446 56. Mulla A, Fernandes G, Menezes L, et al (2017) Diversity of culturable nitrate-reducing bacteria from  
447 the Arabian Sea oxygen minimum zone. *Deep Sea Research Part II: Topical Studies in Oceanography*.  
448 <https://doi.org/10.1016/j.dsr2.2017.12.014>
- 449 57. Cai H, Jiao N (2008) Diversity and Abundance of Nitrate Assimilation Genes in the Northern South  
450 China Sea. *Microb Ecol* 56:751–764. <https://doi.org/10.1007/s00248-008-9394-7>
- 451 58. Jones EBG, Sakayaroj J, Suetrong S, et al (2009) Classification of marine Ascomycota, anamorphic  
452 taxa and Basidiomycota. *Fungal Diversity* 35:187

- 453 59. Allen AE, Booth MG, Frischer ME, et al (2001) Diversity and detection of nitrate assimilation genes  
454 in marine bacteria. *Applied and Environmental Microbiology* 67:5343–5348
- 455 60. Bourbonnais A, Juniper SK, Butterfield DA, et al (2014) Diversity and abundance of Bacteria and  
456 *nirS*-encoding denitrifiers associated with the Juan de Fuca  
457 Ridge hydrothermal system. *Ann Microbiol* 64:1691–1705. [https://doi.org/10.1007/s13213-014-](https://doi.org/10.1007/s13213-014-0813-3)  
458 [0813-3](https://doi.org/10.1007/s13213-014-0813-3)
- 459 61. Rütting T, Boeckx P, Müller C, Klemedtsson L (2011) Assessment of the importance of dissimilatory  
460 nitrate reduction to ammonium for the terrestrial nitrogen cycle. *Biogeosciences* 8:1779–1791.  
461 <https://doi.org/10.5194/bg-8-1779-2011>
- 462 62. Rajpathak SN, Banerjee R, Mishra PG, et al (2018) An exploration of microbial and associated  
463 functional diversity in the OMZ and non-OMZ areas in the Bay of Bengal. *Journal of Biosciences*  
464  
465  
466  
467  
468  
469  
470  
471  
472  
473  
474  
475  
476  
477  
478  
479  
480

481 **Figure Legends**

482 **Figure 1** Several carbohydrate utilizing capacities of bacterial isolates from Arabian sea  
483 and Bay of Bengal.

484 **Figure 2** Bacterial isolates capable to produce various substrate degrading enzymes.

485 **Figure 3** Number of bacterial isolates showing resistances to different antibiotics.

486

487 **Table I**

488 A)

| <b>Location</b> | <b>Latitude</b> | <b>Longitude</b> | <b>Depth (m)</b> | <b>Oxygen concentration (ml/L)</b> |
|-----------------|-----------------|------------------|------------------|------------------------------------|
| Calicut         | 11.377          | 74.712           | 1000             | 0.5559                             |
| Calicut         | 11.621          | 74.903           | 189              | 0.28106                            |
| Calicut         | 11.37           | 75.128           | 96               | 0.51704                            |
| Goa             | 15.755          | 72.819           | 1001             | 0.3527                             |
| Goa             | 15.755          | 72.819           | 503              | 0.04355                            |
| Goa             | 15.707          | 73.009           | 205              | 0.07799                            |
| Goa             | 15.616          | 73.228           | 93               | 1.64047                            |
| Kochi           | 10.176          | 75.907           | 94               | 0.35533                            |
| Kochi           | 10.078          | 75.634           | 250              | 0.35533                            |
| Kochi           | 10.044          | 75.529           | 500              | 0.35533                            |
| Mangalore       | 12.826          | 74.339           | 102              | 0.6854                             |
| Mangalore       | 13.058          | 74.071           | 176              | 0.14161                            |
| Mangalore       | 13.005          | 74.012           | 983              | 0.47906                            |
| Mangalore       | 13.005          | 74.012           | 200              | 0.13913                            |
| Trivandrum      | 8.649           | 76.662           | 110              | 0.38569                            |
| Trivandrum      | 8.724           | 76.428           | 196              | 0.34403                            |
| Trivandrum      | 8.626           | 76.229           | 500              | 0.46625                            |
| Trivandrum      | 8.626           | 76.229           | 750              | 0.46665                            |

489 B)

| <b>Location</b> | <b>Latitude</b> | <b>Longitude</b> | <b>Depth (m)</b> | <b>Oxygen concentration (ml/L)</b> |
|-----------------|-----------------|------------------|------------------|------------------------------------|
| Station1        | 1956.762N       | 8652.630E        | 70               | 0.55                               |



|           |           |           |     |       |
|-----------|-----------|-----------|-----|-------|
| Station2  | 1956.762N | 8652.630E | 70  | 0.55  |
| Station3  | 1956.762N | 8652.630E | 70  | 0.55  |
| Station4  | 1956.762N | 8652.630E | 70  | 0.55  |
| Station5  | 1921.658N | 8546.100E | 510 | 0.07  |
| Station6  | 1707.369N | 8328.174E | 40  | 0.53  |
| Station7  | 1707.369N | 8328.174E | 40  | 0.53  |
| Station8  | 1956.762N | 8652.630E | 320 | 0.03  |
| Station9  | 1508.014N | 8033.868E | 912 | 0.52  |
| Station10 | 1508.014N | 8033.868E | 912 | 0.52  |
| Station11 | 1811.692N | 8427.742E | 468 | 0.04  |
| Station12 | 1707.369N | 8328.174E | 302 | 0.05  |
| Station13 | 1707.369N | 8328.174E | 302 | 0.05  |
| Station14 | 1557.937N | 8142.164E | 359 | 0.11  |
| Station15 | 1800.468N | 8421.505E | 408 | 0.07  |
| Station16 | 1800.468N | 8421.505E | 408 | 0.07  |
| Station17 | 1931.112N | 8553.380E | 550 | 0.05  |
| Station18 | 1931.112N | 8553.380E | 550 | 0.05  |
| Station19 | 1508.014N | 8033.868E | 633 | 0.09  |
| Station20 | 1508.014N | 8033.868E | 633 | 0.09  |
| Station21 | 1557.937N | 8142.164E | 910 | 0.41  |
| Station22 | 1947.570N | 8649.754E | 509 | 0.05  |
| Station23 | 1947.570N | 8649.754E | 509 | 0.05  |
| Station24 | 1707.369N | 8328.174E | 302 | 0.05  |
| Station25 | 1707.369N | 8328.174E | 302 | 0.05  |
| Station26 | 1947.570N | 8649.754E | 20  | 0.623 |
| Station27 | 1947.570N | 8649.754E | 20  | 0.623 |
| Station28 | 1800.468N | 8421.505E | 817 | 0.28  |
| Station29 | 1800.468N | 8421.505E | 817 | 0.28  |
| Station30 | 1921.658N | 8546.100E | 340 | 0.074 |
| Station31 | 1921.658N | 8546.100E | 340 | 0.074 |

490

491 **Table I** Details of sampling site and Physico-chemical parameters of samples collected from A)  
492 Arabian Sea and B) Bay of Bengal waters.

493

494 **Table II**

495 A)

| <b>Bacteria</b> | <b>Identified as</b>                                          | <b>NCBI Accession Number</b> |
|-----------------|---------------------------------------------------------------|------------------------------|
| C1              | <i>Marinobacter sp.</i>                                       | MH256039                     |
| C2              | <i>Halomonas sp.</i>                                          | MH256040                     |
| C3              | <i>Pseudoalteromonas sp.</i>                                  | MH256041                     |
| C4              | <i>Halomonas meridiana strain sz31</i>                        | MH256042                     |
| G1              | <i>Marinobacter salsuginis K-W5</i>                           | MH256043                     |
| G2              | <i>Pseudoalteromonas sp. Bac178</i>                           | MH217583                     |
| G3              | <i>Pseudoalteromonas shioyasakiensis strain QY19</i>          | MH256044                     |
| G4              | <i>Halomonas axialensis strain- ACH-L-8</i>                   | MH256045                     |
| G5              | <i>Halomonas meridiana</i>                                    | MH256046                     |
| G6              | <i>Psychrobacter celer strain B_IV_3825</i>                   | MH256047                     |
| G7              | <i>Paenibacillus sp.</i>                                      | MH256048                     |
| K1              | <i>Halomonas denitrificans strain SVD I</i>                   | MH256049                     |
| K3              | <i>Pseudoalteromonas sp. Bac186</i>                           | MH256050                     |
| K4              | <i>Idiomarina seosinensis</i>                                 | MH256051                     |
| K5              | <i>Halomonas sp. GX18B9-2</i>                                 | MH256052                     |
| K6              | <i>Pseudoalteromonas sp. ECSMB51</i>                          | MH256053                     |
| K7              | <i>Pseudoalteromonas sp. ECSMB70</i>                          | MH256054                     |
| K8              | <i>Pseudoalteromonas sp. ECSMB70</i>                          | MH256055                     |
| K9              | <i>Pseudoalteromonas shioyasakiensis strain NIOSSD020#192</i> | MH256056                     |
| K10             | <i>Pseudoalteromonas sp. Bac186</i>                           | MH256057                     |
| K11             | <i>Pseudoalteromonas lipolytica strain chem16</i>             | MH256058                     |
| M1              | <i>Pseudoalteromonas shioyasakiensis strain SE3</i>           | MH256059                     |
| M2              | <i>Halomonas sp.</i>                                          | MH256060                     |
| M3              | <i>Psychrobacter celer strain K-W15</i>                       | MH256061                     |
| M4              | <i>Idiomarina sp. PR53</i>                                    | MH256062                     |
| M5              | <i>Idiomarina sp. PR53</i>                                    | MH256063                     |
| M6              | <i>Pseudoalteromonas shioyasakiensis strain SE3</i>           | MH256064                     |
| P               | <i>Psychrobacter</i>                                          | MH256065                     |
| T1              | <i>Marinobacter sp. H054</i>                                  | MH256066                     |
| T2              | <i>Halomonas sp. whb34</i>                                    | MH256067                     |
| T3              | <i>Pseudoalteromonas lipolytica strain chem16</i>             | MH256068                     |
| T4              | <i>Halomonas sp. R-28817</i>                                  | MH256069                     |
| T5              | <i>Pseudoalteromonas sp.</i>                                  | MH256070                     |
| T6              | <i>Psychrobacter celer strain 7K1</i>                         | MH256071                     |
| T7              | <i>Pseudoalteromonas sp. NA133</i>                            | MH256072                     |
| T8              | <i>Psychrobacter celer strain B_IV_3L25</i>                   | MH256073                     |
| T9              | <i>Psychrobacter sp. LZB026</i>                               | MH256074                     |
| T10             | <i>Halomonas sp. H2-42</i>                                    | MH256075                     |

|     |                                       |          |
|-----|---------------------------------------|----------|
| T11 | <i>Pseudoalteromonas sp. NPYQ10A</i>  | MH256076 |
| T12 | <i>Psychrobacter celer strain 7K1</i> | MH256077 |

496

497 B)

| <b>Bacteria</b> | <b>Identified as</b>                                            | <b>NCBI Accession Number</b> |
|-----------------|-----------------------------------------------------------------|------------------------------|
| A1              | <i>Halomonas sp. MCCB 340</i>                                   | MH256078                     |
| A2              | <i>Halomonas meridiana strain NIOSSD020#411</i>                 | MH256079                     |
| A3              | <i>Halomonas meridiana strain NIOSSD020#411</i>                 | MH256080                     |
| A4              | <i>Marinobacter hydrocarbonoclasticus strain ss36</i>           | MH256081                     |
| A5              | <i>Halomonas meridiana strain NIOSSD020#411</i>                 | MH256082                     |
| A7              | <i>Halomonas meridiana strain TVG01-C008</i>                    | MH256083                     |
| A8              | <i>Marinobacter salsuginis strain Xmb040</i>                    | MH256084                     |
| A9              | <i>Halomonas meridiana strain Na6MA-1</i>                       | MH256085                     |
| A12             | <i>Marinobacter salsuginis strain Xmb040</i>                    | MH256086                     |
| A13             | <i>Marinobacter salsuginis strain Xmb040</i>                    | MH256087                     |
| A14             | <i>Halomonas meridiana partial 16S rRNA gene, strain Chem17</i> | MH256088                     |
| A16             | <i>Marinobacter salsuginis strain Xmb040</i>                    | MH256089                     |
| A17             | <i>Marinobacter salsuginis strain Xmb040</i>                    | MH256090                     |
| A18             | <i>Marinobacter salsuginis strain Xmb040</i>                    | MH256091                     |
| A20             | <i>Halomonas CDJ15-A06</i>                                      | MH256092                     |
| A21             | <i>Halomonas aquamarina strain NIOSSD020#448</i>                | MH256093                     |
| A22             | <i>Halomonas meridiana strain NIOSSD020#411</i>                 | MH256094                     |
| A23             | <i>Marinobacter salsuginis strain K-W5</i>                      | MH256095                     |
| A24             | <i>Halomonas sp. MCCB 340</i>                                   | MH256096                     |
| A25             | <i>Thalassospira tepidiphila strain SMT41 (only R)</i>          | MH256097                     |
| A27             | <i>Marinobacter salsuginis strain NIOSSD020#173</i>             | MH256098                     |
| A28             | <i>Halomonas sp. MCCB 340</i>                                   | MH256099                     |
| A29             | <i>Halomonas sp. MCCB 340</i>                                   | MH256100                     |
| A30             | <i>Halomonas sp. B-4211</i>                                     | MH256101                     |
| A31             | <i>Halomonas meridiana strain NIOSSD020#411</i>                 | MH256102                     |
| A32             | <i>Halomonas meridiana strain NIOSSD020#411</i>                 | MH256103                     |
| A33             | <i>Halomonas sp. MCCB 340</i>                                   | MH256104                     |
| A34             | <i>Halomonas sp. B-4211</i>                                     | MH256105                     |
| A35             | <i>Halomonas meridiana strain NIOSSD020#411</i>                 | MH256106                     |
| A36             | <i>Halomonas axialensis strain NIOSSK079#24</i>                 | MH256107                     |
| A37             | <i>Halomonas meridiana strain NIOSSD020#411</i>                 | MH256108                     |

498

499 **Table II** Identified bacteria and corresponding NCBI gene sequence ID for A) Arabian sea B) Bay  
500 of Bengal

501 **Supplementary Material Legends**

502 **Supplementary material 1** List of primers used in this study

503 **Supplementary material 2** Colony characterization of AS and BoB isolates

504 **Supplementary material 3** Carbohydrates utilized by AS and BoB isolates

505 **Supplementary material 4** Enzyme activity shown by AS and BoB isolates

506 **Supplementary material 5** Antibiotic resistance shown by AS and BoB isolates

507
